14 **Abstract**

15 Numerous human proteins are either partially or fully classified as intrinsically disordered proteins  
16 (IDPs). Due to their properties, high-resolution structural information about IDPs is generally lacking.  
17 On the other hand, IDPs are known to adopt local ordered structures upon interactions with ligands,  
18 which could be *e.g.* other proteins or lipid membrane surfaces. While recent developments in  
19 protein structure prediction have been revolutionary, their impact on IDP research at high  
20 resolution remains limited. We took a specific example of two myelin-specific IDPs, the myelin basic  
21 protein (MBP) and the cytoplasmic domain of myelin protein zero (P0ct). Both of these IDPs are  
22 known to be crucial for normal nervous system development and function, and while they are  
23 disordered in solution, upon membrane binding, they partially fold into helices, being embedded  
24 into the lipid membrane. We carried out AlphaFold2 predictions of both proteins and analysed the  
25 models in light of previously published data related to solution structure and molecular interactions.  
26 We observe that the predicted models have helical segments that closely correspond to the  
27 characterised membrane-binding sites on both proteins. We furthermore analyse the fits of the  
28 models to SAXS data from the same IDPs. Artificial intelligence-based models of IDPs appear to be  
29 able to provide detailed information on the ligand-bound state of these proteins, instead of the  
30 form dominating free in solution. We further discuss the implications of the predictions for normal  
31 mammalian nervous system myelination and their relevance to understanding disease aspects of  
32 these IDPs.

33

34

## 35 Introduction

36 The artificial intelligence/machine learning-based algorithms of protein structure prediction, most  
37 notably AlphaFold2 [1] and RoseTTAFold [2], have recently revolutionised structural biology.  
38 AlphaFold2 is trained on crystal structures from the Protein Data Bank, which suggests it will predict  
39 conformations that one might find in a protein crystal, and for many folded proteins, the predictions  
40 are essentially identical to the crystal structure – sometimes even allowing error detection in the  
41 experimental structure [3]. With the development of AlphaFold2, the structural coverage of all  
42 human protein residues has gone from 48% to 76%. Thus, the number of proteins with no structural  
43 coverage is now down to 29% [4]. It is, however, obvious that for intrinsically disordered proteins  
44 (IDPs) and flexible multidomain proteins with intrinsically disordered regions (IDRs), AlphaFold2  
45 cannot predict a single accurate 3D structure – which in such cases does not even exist.

46 Considering the above, the fold predictions of AlphaFold2 seem to be relevant for IDPs [5]. Firstly,  
47 AlphaFold2 predicts well regions that will not fold under any normal circumstances [6]. Secondly, it  
48 can predict segments that might fold upon binding to other molecules, *i.e.* the predicted structure  
49 is that of the protein in complexed form with other proteins or lipid membranes. This context-  
50 dependent folding has been predicted by other bioinformatics tools before [7, 8], allowing to detect  
51 functional regions in IDPs that interact with other molecules.

52 IDPs or IDRs do not fold into a stable 3D structure, but rather exist as an ensemble of conformations.  
53 Their conformational properties depend on their amino acid composition, and upon molecular  
54 interactions, secondary structures do form. IDPs are, hence, physicochemically very different from  
55 denatured globular proteins [9]. Due to their specific properties as polymeric chains, several  
56 biological functions have been attributed to IDPs and IDRs. These include, but are not limited to,  
57 acting as molecular rulers, forming membraneless organelles, protecting from collapse under plant  
58 dehydration [10, 11], increasing the avidity of clamp binders [12], and binding to lipid membranes  
59 [13]. Conformational plasticity and the ability for context-dependent folding are central for such  
60 functions of IDPs.

61 The increase in nerve conduction velocity, enabled by the myelin sheath, is mandatory for the  
62 normal functioning of the vertebrate nervous system. Myelin is a multilayered proteolipid  
63 membrane in the central and peripheral nervous system (CNS and PNS, respectively), which is  
64 formed by myelinating glia and wraps around selected axons. The compacted myelin membrane  
65 carries a unique set of proteins, which are either integral or peripheral membrane proteins binding  
66 two or more lipid bilayers together into multilayers. Myelinating cells express several specific IDPs,  
67 which are crucial for the correct formation and stability of the myelin membrane multilayer [14].  
68 Such proteins include the IDPs myelin basic protein (MBP) and periaxin, and the cytoplasmic IDR of  
69 myelin protein zero (P0ct). The folding of disordered myelin proteins has been studied both with  
70 the full proteins and with selected peptide segments [15-21], allowing detection of membrane  
71 interaction sites and lipid binding-induced folding into helices.

72 Intriguingly, many mutations linked to peripheral human neuropathies, mainly different forms of  
73 Charcot-Marie-Tooth disease (CMT), are found in IDPs or IDRs in myelin proteins. This highlights the  
74 important functional/structural role of these protein segments, whereby they may be important  
75 membrane interaction sites or participate in protein-protein complexes. CMT mutations are found  
76 in both P0ct [22-27] and in extended disordered regions of periaxin [28-31]. Puzzlingly, thus far, no  
77 mutations in MBP have been linked to any disease, despite its high abundance and apparent  
78 importance for myelin structure.

79 The high-resolution 3D structure determination of MBP and P0ct has proven to be difficult, if not  
80 impossible, given the futile attempts over the past three decades. Here, we extracted information  
81 through the most recent computational predictions, namely, the AlphaFold2 models of MBP and

82 P0ct. For both proteins, we analyse earlier experimental data in light of the AlphaFold2 models and  
83 show that AlphaFold2 models are valuable even in the case of highly flexible, disordered proteins,  
84 helping to understand the function and interactions of these proteins at the molecular level.

85

## 86 **Methods**

### 87 *Generation of molecular models for MBP and P0ct*

88 AlphaFold2 [1] was run on the Google ColabFold site [32], giving as input only the amino acid  
89 sequence of mouse 18.5-kDa MBP isoform and human P0ct. The resulting 5 models were all relaxed  
90 with the Amber implementation in AlphaFold2. The models were used as such for further analyses.

### 91 *SAXS data analysis*

92 SAXS data for mouse MBP and human P0ct from our earlier publications [13, 33] were directly used  
93 to assess the fits of the AlphaFold2 models to the experimental data. Specifically, the programs  
94 CRY SOL [34], OLIGOMER [35], and EOM [36] were used.  $R_g$  values were additionally estimated using  
95 the Guinier plot in PRIMUS [35] and with the Debye formalism, as described [37, 38].  $D_{max}$  was  
96 manually estimated using GNOM [39], such that the distance distribution had a reasonable shape  
97 and the fit to the raw SAXS data was optimal.

### 98 *Bioinformatics and structure analysis*

99 Sequence-based predictions for both proteins have been published [40, 41]. The highest-scoring  
100 AlphaFold2 models of MBP and P0ct were docked onto planar and curved lipid bilayers with  
101 properties of a eukaryotic plasma membrane, using the PPM server [42]. Visualisation and surface  
102 electrostatics calculations were carried out in PyMOL [43] with the APBS [44] plugin. Previously  
103 published bioinformatics and structural results were considered and further analysed in relation to  
104 the current predictions.

105

## 106 **Results and Discussion**

107 The myelin sheath is a multilayered proteolipid membrane with unique proteins, such as myelin  
108 basic protein (MBP), myelin protein zero (P0) and peripheral myelin protein 2 (P2), which all function  
109 in the tight stacking of the lipid bilayers, ensuring correct functioning of the myelin sheath.  
110 Malfunction of this system, for example mutations in myelin proteins or autoimmune attack, results  
111 in neurological diseases, such as multiple sclerosis, various types of Charcot-Marie-Tooth disease  
112 (CMT), Dejerine-Sottas syndrome, and congenital hypomyelination. While some myelin proteins are  
113 structurally well-defined, like P2, there several myelin IDPs that only change their conformation  
114 upon different interactions, including MBP and P0ct.

115 Encouraged by work from others on understanding IDPs and their conditionally folded segments  
116 [45-47], we set out to analyse earlier experimental SAXS data [13, 33] as well as literature in light of  
117 AlphaFold2 models of MBP and P0ct. We expected to get an improved picture about the folding of  
118 these two myelin-specific proteins, when they interact with membrane surfaces, since we expected  
119 AlphaFold2 to predict ordered conformations with high confidence. While AlphaFold2 cannot  
120 predict accurate atomistic 3D structures for IDPs, and we did not expect high-resolution information  
121 on folding, we focused on observing if we can better explain the unique membrane interactions of  
122 these two myelin IDPs. Furthermore, AlphaFold2 can predict, which parts of the IDP do not fold  
123 upon interactions with other molecules or surfaces.

124 For both MBP and P0ct, data from various biophysical experiments have been published [33, 41, 48-  
125 53], showing folding of both proteins upon membrane binding, while they remain unfolded in  
126 aqueous solution. The regions binding to membranes have been mapped to specific segments,  
127 mainly those prone to fold into helices according to predictions. Several studies have shed light on  
128 more details of membrane binding by focusing on peptides corresponding to the membrane-binding  
129 sites. The relation of the membrane-binding sites of myelin proteins with possible autoantigenic  
130 epitopes in disease [15, 40], such as multiple sclerosis, together with molecular mimicry of certain  
131 viruses like EBV [54], suggests that detailed fundamental studies on myelin protein membrane  
132 interactions can give new insights into both myelin biology and pathology. How useful might an AI-  
133 based prediction of protein 3D structure be in this scenario?

### 134 ***Myelin basic protein – the molecular glue in myelin***

135 MBP lacks a well-defined structure in aqueous solution, but it changes conformation depending on  
136 its interactions and the chemical environment. In fact, its disordered nature was described already  
137 nearly 50 years ago, well before IDPs had become a central topic in protein biochemistry [55]. MBP  
138 is one of the best-characterized proteins of the myelin sheath, playing a role in many different  
139 interactions, oligodendrocyte proliferation, stabilization of myelinogenesis and membrane stacking  
140 [56]. The oligodendrocyte lineage (golli) gene gives rise to a variety of MBP isoforms ranging from  
141 14.0 kDa to 21.5 kDa, with the 18.5 kDa isoform being the most predominant one in human mature  
142 myelin [57]. Furthermore, all isoforms of MBP have a positive charge depending on post-  
143 translational modifications (PTMs), referred to as C1 to C8, where C1 is the most basic isomer (net  
144 charge of +19 at physiological pH), with the least amount of PTMs [58]. The most common PTMs  
145 are phosphorylation and citrullination, with the C8 isoform being the least basic isomer having  
146 decreased ligand interactions compared to the C1 isoform [59].

147 Despite early support for a  $\beta$ -sheet MBP structure, Mendz et al. suggested in 1990 that certain  
148 interaction sites within the molecule form helices when mixed with detergent micelles [60].  
149 Especially this model has been considered for the central helical segment between residues 82 and  
150 93 in mouse 18.5-kDa MBP (85-96 in human MBP), and an  $\alpha$ -helical model would facilitate  
151 interactions with lipid head groups [61]. With the use of electron paramagnetic resonance  
152 spectroscopy and molecular dynamics simulations, later studies indicated an  $\alpha$ -helical structure for

153 this segment [62]. The depth profile indicated an amphipathic  $\alpha$ -helix penetrating up to 12 Å into  
154 the myelin-like membrane. MBP has high levels of arginine and low levels of glutamatic acid, which  
155 contributes to its basicity, required for its interaction with negatively charged phospholipids. With  
156 the less basic isoform C8, the C-terminal region dissociated from the membrane, while the N-  
157 terminal site was more mobile than for C1 [52]. In the same study, the Phe-86/Phe-87 motif was  
158 important for the formation of the helix and its attachment to lipids [52, 59]. Overall, three MBP  
159 segments, T33-D46, V83-T92 and Y142-L154, have been experimentally found to be  $\alpha$ -helical,  
160 located close to the N and C terminus and in the central region of MBP; the formation of these  
161 helices is regulated by the local hydrophobic interactions between the nonpolar surface of the helix  
162 and the lipid bilayer [57]. Wang et al. further confirmed with SPR that the interactions between MBP  
163 and lipid monolayers are electrostatic, and the protein binds strongly with increased fraction of  
164 negative headgroups [63].

165 The most abundant and experimentally best studied isoform of MBP, the 169-residue 18.5-kDa  
166 isoform, was used for the analyses here. The five models of MBP predicted by AlphaFold2 are shown  
167 in **Fig. 1A**. All 5 models have similar folds and dimensions. The superposition of the obtained models  
168 creates a structural ensemble akin to those obtained *e.g.* from EOM based on SAXS data [ref], but  
169 in this case, the models are based on sequence alone.

170 A more detailed analysis of the predicted structures is, therefore, warranted. A comparison of their  
171  $R_g$  and  $D_{max}$  to those obtained from EOM is shown in **Fig. 1B**. The AlphaFold2 models apparently  
172 have a smaller  $R_g$  for the same  $D_{max}$ , when compared to the flexible random-chain models produced  
173 by EOM – this reflects the presence of folded secondary structure elements in the models; also note  
174 how the predicted helices tend to cluster together in the models (**Fig. 1A**). Three helices are  
175 predicted in all models (at residue ranges 36-45, 83-92, and 148-153), and these correspond to the  
176 membrane- and calmodulin-binding sites identified earlier [18-20, 59] that become  $\alpha$ -helical upon  
177 binding. This observation indicates that AlphaFold2 has predicted, at least partially, the membrane-  
178 bound conformation of MBP, rather than the form free in solution.

179

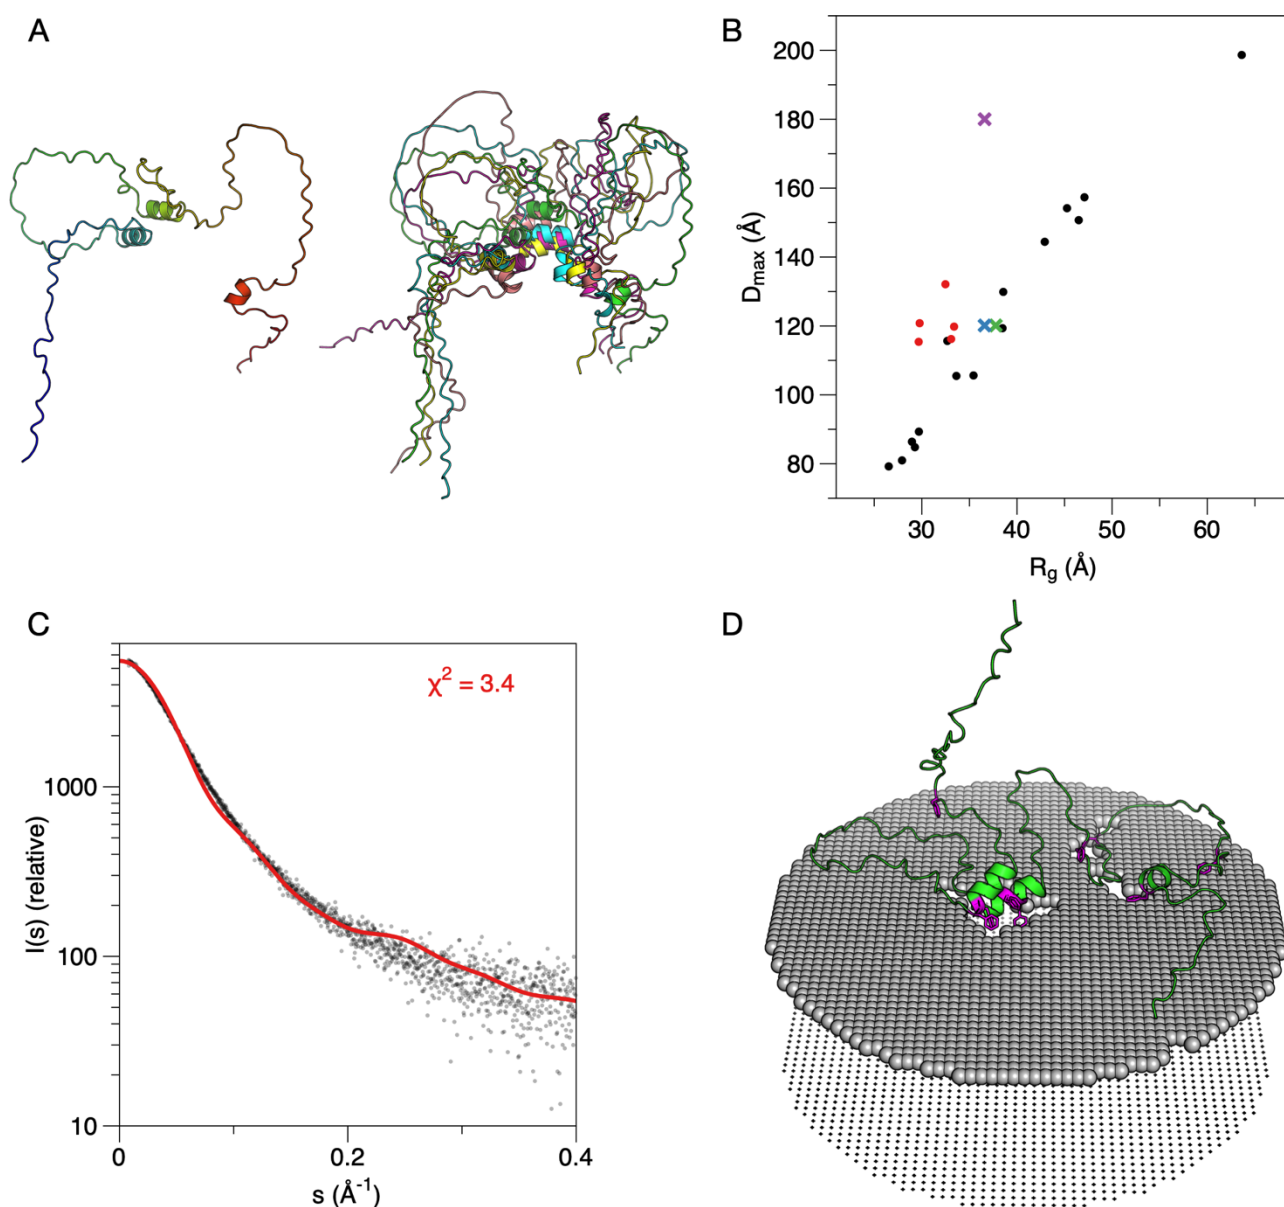

180

181 **Figure 1. AlphaFold2 models of MBP.** A. The top ranked (left) model and superposition of the 5  
 182 obtained models (right). Note how the overall dimensions and shape are similar, and that the three  
 183 short helices cluster in the middle in all cases. B. Comparison of the AlphaFold2 models (red dots)  
 184 and the EOM ensemble based on solution SAXS data (black dots). The average  $R_g/D_{max}$  from EOM is  
 185 shown with a green cross, the Guinier  $R_g$  with  $D_{max}$  from EOM with a blue cross, and the Guinier  $R_g$   
 186 with manually determined  $D_{max}$  from GNOM with a magenta cross. While the models cluster close  
 187 to the average experimental values from EOM, they systematically have a lower  $R_g$ , which is a sign  
 188 of the presence of folded structure. C. Fit of the top ranked model alone to experimental SAXS data  
 189 [13]. A similar overall shape is obvious, and the fluctuations are related to the secondary structures  
 190 in the model and their clustering. D. Docking of the top ranked model onto a lipid bilayer surface  
 191 suggests membrane interactions by the helices and lends support to the hypothesis that the  
 192 predicted model reflects the membrane-bound state. Phe residues are highlighted in magenta.

193

194 The highest-ranked AlphaFold2 model of MBP provided a reasonable fit alone to the raw  
 195 experimental SAXS data (**Fig. 1C**). The fit was not improved by fitting all five models simultaneously  
 196 using OLIGOMER. This does indicate that the top model alone is a reasonable representation of MBP  
 197 structure – with the caveat that we expect AlphaFold2 to rather predict the membrane-bound

198 model than the one free in solution. With this in mind, we modelled the AlphaFold2 structure onto  
199 a membrane surface (**Fig. 1D**). Whether the MBP helices cluster together on the membrane, as seen  
200 in the AlphaFold2 models, is not known. Notably, the two main helices that come together in the  
201 models both harbour a double Phe motif, which has been shown to be crucial for MBP function in  
202 membrane stacking [64]. MBP compacts drastically upon being embedded between two  
203 membranes [13], which are only 3 nm apart, and this clustering of helical segments could be a  
204 mechanism of structural compaction. Given that the internal helices of MBP would cluster together  
205 as predicted by AlphaFold2, this could represent the intermolecular mechanism that ultimately  
206 results in the liquid-liquid phase separation of MBP [64]. In addition, the conformation could  
207 coarsely represent the formation of a gel-like protein phase on the surface of a lipid bilayer, which  
208 we earlier observed using cryo-EM and neutron reflectometry [13].

209

### 210 ***The cytoplasmic domain of P0 – similar but different to MBP***

211 P0 is the major protein in the PNS myelin, being primarily expressed in Schwann cells. The Ig-like  
212 extracellular domain is the only part of the P0 that has been structurally characterized at atomic  
213 detail using X-ray crystallography [65, 66]. The transmembrane domain of full-length P0 contains a  
214 single  $\alpha$ -helix. Within the myelin sheath, the P0 is assumed to form homodimers due to the “glycine  
215 zipper” associated with the domain [67]. P0 molecules are believed to oligomerize between proteins  
216 located on apposing membranes [68], *via* both the extracellular and intracellular domains. The  
217 cytoplasmic domain P0ct is not only important for membrane stacking at the PNS major dense line,  
218 but given its nature as part of a transmembrane protein, it could be involved in P0 trafficking, which  
219 further is regulated by post-translational modifications in the P0ct [51].

220 P0ct is comprised of 69 residues, being disordered in solution and having a high positive charge.  
221 However, CMT disease-causing mutations have been identified within this domain [22-27],  
222 highlighting its importance for proper myelination. Like MBP, P0ct folds into helical structures upon  
223 interactions with lipid membranes [33, 41]. P0ct has a strong (+15) positive charge, carrying 21 basic  
224 and 6 acidic residues [69]. Full-length P0 contains three cysteine residues; Cys21 and Cys98 form  
225 the disulphide bond of the extracellular domain. The third cysteine resides in the cytoplasmic  
226 domain at the junction between the transmembrane domain and the cytoplasmic tail [70]. This  
227 conserved cysteine is an acylation site and often undergoes palmitoylation [70, 71]. A mutation of  
228 this residue results in loss in both the attachment of fatty acid and the adhesiveness of P0 [72].  
229 When mutated or truncated, the ability of P0ct to hold two membranes together is lost, suggesting  
230 that acylation participates in myelin stability [72, 73]. P0ct as a free peptide in aqueous solution is  
231 unfolded, as determined by CD spectroscopy, but gains secondary structure upon lipid interactions.  
232 The folding was earlier suggested to be mostly  $\beta$ -sheets, but later studies strongly support a more  
233  $\alpha$ -helical conformation [33, 48]. We showed that full-length P0 organises into dimers in a zipper-like  
234 way when reconstituted into small unilamellar vesicles, and P0ct in a lipidic environment induced  
235 Bragg peaks when subjected to small-angle X-ray diffraction in a concentration-dependent manner  
236 [33], indicating spontaneous assembly of ordered semi-crystalline structures.

237 P0ct models are shown in **Fig. 2A**, and their  $R_g$  and  $D_{max}$  distribution with respect to EOM results are  
238 shown in **Fig. 2B**. The outcome is similar to MBP, giving a further indication of the shared  
239 physicochemical properties between MBP and P0ct. One helix is predicted at the beginning of the  
240 P0ct; this segment is expected to bind along the membrane surface, and to be anchored to the  
241 membrane tightly *via* both the transmembrane domain and the palmitoylated Cys [21]. A second  
242 helix is in the middle region of P0ct and represents an additional membrane anchor [41]; whether  
243 it binds to the same or the apposing membrane in myelin, is currently not known. Mutations D224Y  
244 and R227S at this helical site are linked to CMT [22-25, 33, 41]. Intriguingly, this helical site is also a



245 hotspot for PTMs, such as phosphorylation, that have been linked to the trafficking of PO during  
246 myelination [51].

247 The highest-ranked AlphaFold2 model of P0ct fits well to the SAXS data (**Fig. 2C**). OLIGOMER fitting  
248 of the 5 top models did not improve this fit, and the full EOM ensemble fit only slightly better than  
249 the single predicted model, indicating that the model reproduces well the average size and shape  
250 of P0ct in solution. Furthermore, the original *ab initio* model built based on the SAXS data [33] again  
251 only provides a marginally better fit than the AlphaFold2 model (**Table 1**).

252

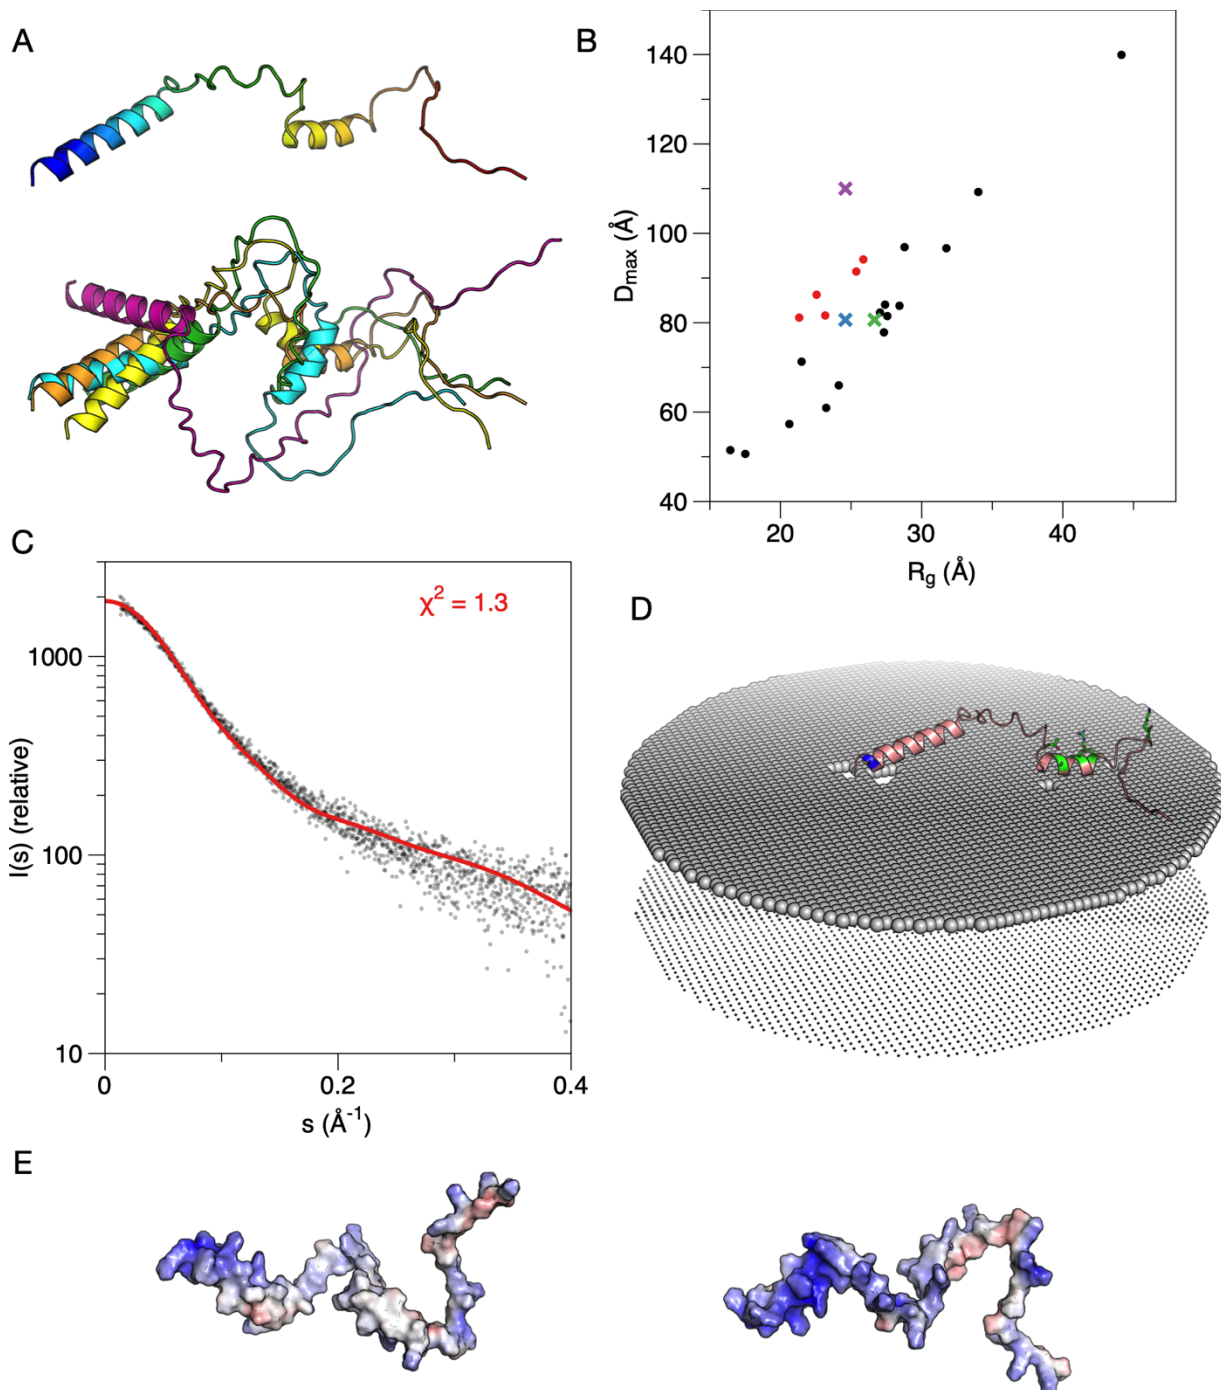

253

254 **Figure 2. AlphaFold2 analysis of P0ct.** A. The top-ranked model (top) and all five models  
255 superimposed (bottom). All models include two helices and have similar dimensions. B. Comparison  
256 of the P0ct AlphaFold2 models (red dots) and the full EOM ensemble (black dots). The green cross  
257 indicates the average values from EOM analysis of experimental data [33]. The Guinier  $R_g$  with  $D_{max}$

258 *from EOM is marked with a blue cross and the Guinier  $R_g$  with manually determined  $D_{max}$  from GNOM*  
259 *with a magenta cross. C. The top ranked P0ct model fits the raw SAXS data very well. D. Docking of*  
260 *the P0ct model onto a membrane surface. Blue indicates the location of the Cys residue close to the*  
261 *transmembrane domain, and CMT mutation sites are coloured green. E. Electrostatic surface of P0ct*  
262 *from two orientations. The face binding the membrane is hydrophobic (left), while the opposite side*  
263 *is positively charged (right).*

264

265 The helices predicted by AlphaFold2 on P0ct coincide with earlier identified functional segments  
266 interacting with lipid membranes (see above). Furthermore, peptides encompassing both of the  
267 predicted helices in P0ct have been used to generate animal models of human autoimmune  
268 neuropathies [74]. Hence, these sites are known to show disorder-to-order transitions and either  
269 carry point mutations for CMT disease or autoantigenic epitopes that induce experimental  
270 autoimmune neuritis and possibly human Guillain-Barré syndrome [41, 75].

271 Interestingly for an IDP, a total of 6 missense mutations have been identified in the P0 cytoplasmic  
272 tail, linked to human CMT [22-27]. The location of these mutations in the model is depicted in **Fig.**  
273 **2D**, which also shows the predicted orientation of the P0ct model on a membrane surface.  
274 Importantly, these mutations are concentrated within the central region of P0ct, mainly in the  
275 membrane-binding helix. Intriguingly, one of them, D224Y, causes both hypermyelination in  
276 patients and increased membrane stacking *in vitro* [24, 41]. The model suggests the CMT mutations  
277 in P0ct could directly affect its membrane interactions in the tightly confined space of the myelin  
278 major dense line. The electrostatic potential surface of the P0ct highest ranked model is shown in  
279 **Fig. 2E**, indicating a positively charged face and a hydrophobic surface, compatible with amphipathic  
280 membrane interactions. Considering the tightly confined space of the PNS major dense line, we  
281 currently cannot be sure whether the middle helical segment of P0ct binds to the same membrane  
282 as the transmembrane domain, or if it reaches over and inserts itself into the apposing cytoplasmic  
283 leaflet.

284

### 285 ***Additional notes on fitting to SAXS data***

286 While for both MBP and P0ct, EOM gives the best fit to the experimental SAXS data, it is quite  
287 remarkable how well the single first-ranked AlphaFold2-based IDP models of MBP and P0ct fit the  
288 SAXS data published before. Single *ab initio* models fit the data slightly worse than the full  
289 conformational EOM ensembles, showing the presence of several conformations. Especially in the  
290 case of P0ct, a single AlphaFold2 model fits very well to the solution SAXS data from recombinant  
291 P0ct. IDPs are often not straightforward cases for SAXS studies, as discussed in recent literature [76].  
292 The data do indicate that single models of IDPs from AlphaFold2 can complement SAXS data and  
293 provide reliable representations of the IDP at low resolution. As for folded proteins, therefore, such  
294 models can be valuable additions to support experimental data and help in setting up and evaluating  
295 hypotheses on structure-function relationships.

296 In essence, for both IDPs studied here, the AlphaFold2 models are close to the average  $D_{max}$  of the  
297 disordered EOM ensemble and the  $R_g$  obtained from Guinier plot (**Fig. 1B, 2B**). On the other hand,  
298  $D_{max}$  determined in a traditional way subjectively from distance distribution more estimates the  
299 absolute largest  $D_{max}$  in the population instead of the average (**Fig. 1B, 2B**). For IDPs, Debye  
300 formalism provides a more relevant  $R_g$  than the Guinier plot [37], and indeed, this value is close to  
301 that of the EOM ensemble average  $R_g$ . From Debye analysis, the  $R_g$  for MBP is 42.1 Å and that for  
302 P0ct 26.2 nm. These analyses further indicate that the AlphaFold2 models do not represent the  
303 disordered ensembles in solution, but slightly compacted conformations, possibly corresponding to

304 the lipid-bound conformation.

305

306 **Table 1. Fits of different models to experimental synchrotron SAXS data.** The values given in the  
307 table are  $\chi^2$  for the fit between model and experimental data.

| Protein                                            | MBP      | P0ct     |
|----------------------------------------------------|----------|----------|
| Highest-ranked AlphaFold2 model alone              | 3.4      | 1.3      |
| OLIGOMER solution, fitting all 5 AlphaFold2 models | 4.3      | 1.3      |
| Full EOM ensemble                                  | 1.0      | 1.0      |
| Chain-like <i>ab initio</i> model (GASBOR)         | 1.1 [13] | 1.1 [33] |

308

309

### 310 Conclusions

311 The intermembrane compartment harbouring MBP and P0ct in the PNS, the major dense line, is  
312 very tight, with a spacing of only ~3 nm between the bilayers. This indicates, together with the  
313 expected molecular dimensions of both MBP and P0ct, that both proteins must interact with two  
314 membranes simultaneously. These interactions are enabled by both the membrane anchor  
315 segments forming  $\alpha$ -helices as well as the flexible, disordered segments between them. The use of  
316 AlphaFold2 models in this short report has highlighted that molecular models can be used to obtain  
317 additional details of functional significance in combination with earlier and current experimental  
318 data. In some cases, conclusions can be drawn, for example, on the effects of disease mutations on  
319 IDP structure and interactions. While the overall 3D structure of an AlphaFold2 model of an IDP will  
320 not be accurate, nor does it give much information about conformational ensembles, it does give  
321 relevant information about average molecular size and shape, as well as segments that are likely to  
322 fold into secondary structure upon molecular interactions. Accordingly, it has not escaped our  
323 attention that for both IDPs studied here, the highest-ranked AlphaFold2 model fits the solution  
324 SAXS data remarkably well, considering the only input to modelling was the sequence of an IDP.  
325 Hence, AlphaFold2 does provide meaningful information on at least the overall size and shape of  
326 these IDPs, but it additionally has the power to predict interaction sites and conditionally folded  
327 segments linked to them. Hence, in combination with experimental biophysical and structural work  
328 on IDPs, the predicted models can help explain molecular mechanisms in IDP biology and disease.

329

330

## 331 References

- 332 1. Jumper J, Evans R, Pritzel A, Green T, Figurnov M, Ronneberger O, et al. Highly accurate  
333 protein structure prediction with AlphaFold. *Nature*. 2021;596(7873):583–9. Epub 20210715. doi:  
334 10.1038/s41586-021-03819-2. PubMed PMID: 34265844; PubMed Central PMCID:  
335 PMCPMC8371605.
- 336 2. Baek M, DiMaio F, Anishchenko I, Dauparas J, Ovchinnikov S, Lee GR, et al. Accurate  
337 prediction of protein structures and interactions using a three-track neural network. *Science*.  
338 2021;373(6557):871–6. Epub 20210715. doi: 10.1126/science.abj8754. PubMed PMID: 34282049;  
339 PubMed Central PMCID: PMCPMC7612213.
- 340 3. Hegedus T, Geisler M, Lukacs GL, Farkas B. Ins and outs of AlphaFold2 transmembrane  
341 protein structure predictions. *Cell Mol Life Sci*. 2022;79(1):73. Epub 20220115. doi:  
342 10.1007/s00018-021-04112-1. PubMed PMID: 35034173; PubMed Central PMCID:  
343 PMCPMC8761152.
- 344 4. Porta-Pardo E, Ruiz-Serra V, Valentini S, Valencia A. The structural coverage of the human  
345 proteome before and after AlphaFold. *PLOS Computational Biology*. 2022;18(1):e1009818. doi:  
346 10.1371/journal.pcbi.1009818.
- 347 5. Guo HB, Perminov A, Bekele S, Kedziora G, Farajollahi S, Varaljay V, et al. AlphaFold2  
348 models indicate that protein sequence determines both structure and dynamics. *Sci Rep*.  
349 2022;12(1):10696. Epub 20220623. doi: 10.1038/s41598-022-14382-9. PubMed PMID: 35739160;  
350 PubMed Central PMCID: PMCPMC9226352.
- 351 6. Wilson CJ, Choy WY, Karttunen M. AlphaFold2: A Role for Disordered Protein/Region  
352 Prediction? *Int J Mol Sci*. 2022;23(9). Epub 20220421. doi: 10.3390/ijms23094591. PubMed  
353 PMID: 35562983; PubMed Central PMCID: PMCPMC9104326.
- 354 7. Cilia E, Pancsa R, Tompa P, Lenaerts T, Vranken WF. The DynaMine webserver: predicting  
355 protein dynamics from sequence. *Nucleic Acids Res*. 2014;42(Web Server issue):W264–70. Epub  
356 20140411. doi: 10.1093/nar/gku270. PubMed PMID: 24728994; PubMed Central PMCID:  
357 PMCPMC4086073.
- 358 8. Meszaros B, Simon I, Dosztanyi Z. Prediction of protein binding regions in disordered  
359 proteins. *PLoS Comput Biol*. 2009;5(5):e1000376. Epub 20090501. doi:  
360 10.1371/journal.pcbi.1000376. PubMed PMID: 19412530; PubMed Central PMCID:  
361 PMCPMC2671142.
- 362 9. van der Lee R, Buljan M, Lang B, Weatheritt RJ, Daughdrill GW, Dunker AK, et al.  
363 Classification of intrinsically disordered regions and proteins. *Chem Rev*. 2014;114(13):6589–631.  
364 Epub 20140429. doi: 10.1021/cr400525m. PubMed PMID: 24773235; PubMed Central PMCID:  
365 PMCPMC4095912.
- 366 10. Mouillon JM, Eriksson SK, Harryson P. Mimicking the plant cell interior under water stress  
367 by macromolecular crowding: disordered dehydrin proteins are highly resistant to structural  
368 collapse. *Plant Physiol*. 2008;148(4):1925–37. Epub 20081010. doi: 10.1104/pp.108.124099.  
369 PubMed PMID: 18849483; PubMed Central PMCID: PMCPMC2593683.
- 370 11. Mouillon JM, Gustafsson P, Harryson P. Structural investigation of disordered stress  
371 proteins. Comparison of full-length dehydrins with isolated peptides of their conserved segments.  
372 *Plant Physiol*. 2006;141(2):638–50. Epub 20060324. doi: 10.1104/pp.106.079848. PubMed PMID:  
373 16565295; PubMed Central PMCID: PMCPMC1475461.
- 374 12. Gonzalez-Foutel NS, Glavina J, Borchers WM, Safranchik M, Barrera-Vilarmau S, Sagar  
375 A, et al. Conformational buffering underlies functional selection in intrinsically disordered protein  
376 regions. *Nat Struct Mol Biol*. 2022;29(8):781–90. Epub 20220810. doi: 10.1038/s41594-022-  
377 00811-w. PubMed PMID: 35948766.
- 378 13. Raasakka A, Ruskamo S, Kowal J, Barker R, Baumann A, Martel A, et al. Membrane  
379 Association Landscape of Myelin Basic Protein Portrays Formation of the Myelin Major Dense  
380 Line. *Sci Rep*. 2017;7(1):4974. Epub 20170710. doi: 10.1038/s41598-017-05364-3. PubMed  
381 PMID: 28694532; PubMed Central PMCID: PMCPMC5504075.
- 382 14. Raasakka A, Kursula P. Flexible Players within the Sheaths: The Intrinsically Disordered  
383 Proteins of Myelin in Health and Disease. *Cells*. 2020;9(2). Epub 20200218. doi:  
384 10.3390/cells9020470. PubMed PMID: 32085570; PubMed Central PMCID: PMCPMC7072810.

- 385 15. Muruganandam G, Burck J, Ulrich AS, Kursula I, Kursula P. Lipid membrane association of  
386 myelin proteins and peptide segments studied by oriented and synchrotron radiation circular  
387 dichroism spectroscopy. *J Phys Chem B*. 2013;117(48):14983-93. Epub 20131122. doi:  
388 10.1021/jp4098588. PubMed PMID: 24236572.
- 389 16. Tuusa J, Raasakka A, Ruskamo S, Kursula P. Myelin-derived and putative molecular  
390 mimic peptides share structural properties in aqueous and membrane-like environments. *Mult*  
391 *Scler Demyelinating Dis*. 2017;2:4. doi: 10.1186/s40893-017-0021-7.
- 392 17. Ahmed MA, De Avila M, Polverini E, Bessonov K, Bamm VV, Harauz G. Solution nuclear  
393 magnetic resonance structure and molecular dynamics simulations of a murine 18.5 kDa myelin  
394 basic protein segment (S72-S107) in association with dodecylphosphocholine micelles.  
395 *Biochemistry*. 2012;51(38):7475-87. Epub 20120914. doi: 10.1021/bi300998x. PubMed PMID:  
396 22947219.
- 397 18. Bamm VV, De Avila M, Smith GS, Ahmed MA, Harauz G. Structured functional domains of  
398 myelin basic protein: cross talk between actin polymerization and Ca(2+)-dependent calmodulin  
399 interaction. *Biophys J*. 2011;101(5):1248-56. doi: 10.1016/j.bpj.2011.07.035. PubMed PMID:  
400 21889463; PubMed Central PMCID: PMC3164172.
- 401 19. Polverini E, Boggs JM, Bates IR, Harauz G, Cavatorta P. Electron paramagnetic resonance  
402 spectroscopy and molecular modelling of the interaction of myelin basic protein (MBP) with  
403 calmodulin (CaM)-diversity and conformational adaptability of MBP CaM-targets. *J Struct Biol*.  
404 2004;148(3):353-69. doi: 10.1016/j.jsb.2004.08.004. PubMed PMID: 15522783.
- 405 20. Wang C, Neugebauer U, Burck J, Myllykoski M, Baumgartel P, Popp J, et al. Charge  
406 isomers of myelin basic protein: structure and interactions with membranes, nucleotide  
407 analogues, and calmodulin. *PLoS One*. 2011;6(5):e19915. Epub 20110525. doi:  
408 10.1371/journal.pone.0019915. PubMed PMID: 21647440; PubMed Central PMCID:  
409 PMC3102069.
- 410 21. Myllykoski M, Baumgartel P, Kursula P. Conformations of peptides derived from myelin-  
411 specific proteins in membrane-mimetic conditions probed by synchrotron radiation CD  
412 spectroscopy. *Amino Acids*. 2012;42(4):1467-74. Epub 20110420. doi: 10.1007/s00726-011-  
413 0911-5. PubMed PMID: 21505824.
- 414 22. Fabrizi GM, Pellegrini M, Angiari C, Cavallaro T, Morini A, Taioli F, et al. Gene dosage  
415 sensitivity of a novel mutation in the intracellular domain of P0 associated with Charcot-Marie-  
416 Tooth disease type 1B. *Neuromuscul Disord*. 2006;16(3):183-7. Epub 20060220. doi:  
417 10.1016/j.nmd.2006.01.006. PubMed PMID: 16488608.
- 418 23. Miltenberger-Miltenyi G, Schwarzbraun T, Loscher WN, Wanschitz J, Windpassinger C,  
419 Duba HC, et al. Identification and in silico analysis of 14 novel GJB1, MPZ and PMP22 gene  
420 mutations. *Eur J Hum Genet*. 2009;17(9):1154-9. Epub 20090304. doi: 10.1038/ejhg.2009.29.  
421 PubMed PMID: 19259128; PubMed Central PMCID: PMC2986587.
- 422 24. Schneider-Gold C, Kotting J, Epplen JT, Gold R, Gerding WM. Unusual Charcot-Marie-  
423 Tooth phenotype due to a mutation within the intracellular domain of myelin protein zero. *Muscle*  
424 *Nerve*. 2010;41(4):550-4. doi: 10.1002/mus.21523. PubMed PMID: 19882637.
- 425 25. Shy ME, Jani A, Krajewski K, Grandis M, Lewis RA, Li J, et al. Phenotypic clustering in  
426 MPZ mutations. *Brain*. 2004;127(Pt 2):371-84. Epub 20040107. doi: 10.1093/brain/awh048.  
427 PubMed PMID: 14711881.
- 428 26. Street VA, Meekins G, Lipe HP, Seltzer WK, Carter GT, Kraft GH, et al. Charcot-Marie-  
429 Tooth neuropathy: clinical phenotypes of four novel mutations in the MPZ and Cx 32 genes.  
430 *Neuromuscul Disord*. 2002;12(7-8):643-50. doi: 10.1016/s0960-8966(02)00021-4. PubMed PMID:  
431 12207932.
- 432 27. Su Y, Brooks DG, Li L, Lepercq J, Trofatter JA, Ravetch JV, et al. Myelin protein zero gene  
433 mutated in Charcot-Marie-tooth type 1B patients. *Proc Natl Acad Sci U S A*. 1993;90(22):10856-  
434 60. doi: 10.1073/pnas.90.22.10856. PubMed PMID: 7504284; PubMed Central PMCID:  
435 PMC3164172.
- 436 28. Guilbot A, Williams A, Ravise N, Verny C, Brice A, Sherman DL, et al. A mutation in  
437 periaxin is responsible for CMT4F, an autosomal recessive form of Charcot-Marie-Tooth disease.  
438 *Hum Mol Genet*. 2001;10(4):415-21. doi: 10.1093/hmg/10.4.415. PubMed PMID: 11157804.

- 439 29. Kijima K, Numakura C, Shirahata E, Sawaishi Y, Shimohata M, Igarashi S, et al. Periaxin  
440 mutation causes early-onset but slow-progressive Charcot-Marie-Tooth disease. *J Hum Genet.*  
441 2004;49(7):376-9. Epub 20040612. doi: 10.1007/s10038-004-0162-3. PubMed PMID: 15197604.
- 442 30. Shintaku M, Maeda K, Shiohara M, Namura T, Kushima R. Neuropathology of the spinal  
443 nerve roots, spinal cord, and brain in the first autopsied case of Charcot-Marie-Tooth disease 4F  
444 with a D651N mutation in the periaxin gene. *Neuropathology.* 2021;41(4):281-7. Epub 20210517.  
445 doi: 10.1111/neup.12731. PubMed PMID: 34002422.
- 446 31. Tokunaga S, Hashiguchi A, Yoshimura A, Maeda K, Suzuki T, Haruki H, et al. Late-onset  
447 Charcot-Marie-Tooth disease 4F caused by periaxin gene mutation. *Neurogenetics.*  
448 2012;13(4):359-65. Epub 20120801. doi: 10.1007/s10048-012-0338-5. PubMed PMID: 22847150.
- 449 32. Mirdita M, Schutze K, Moriwaki Y, Heo L, Ovchinnikov S, Steinegger M. ColabFold:  
450 making protein folding accessible to all. *Nat Methods.* 2022;19(6):679-82. Epub 20220530. doi:  
451 10.1038/s41592-022-01488-1. PubMed PMID: 35637307; PubMed Central PMCID:  
452 PMCPMC9184281.
- 453 33. Raasakka A, Ruskamo S, Kowal J, Han H, Baumann A, Myllykoski M, et al. Molecular  
454 structure and function of myelin protein P0 in membrane stacking. *Sci Rep.* 2019;9(1):642. Epub  
455 20190124. doi: 10.1038/s41598-018-37009-4. PubMed PMID: 30679613; PubMed Central  
456 PMCID: PMCPMC6345808.
- 457 34. Svergun DI, Barberato C, Koch MH. CRYSOLE - A program to evaluate X-ray solution  
458 scattering of biological macromolecules from atomic coordinates. *J Appl Crystallogr: International  
459 Union of Crystallography;* 1995. p. 768-73.
- 460 35. Konarev PV, Volkov VV, Sokolova AV, Koch MHJ, Svergun DI. PRIMUS: a Windows PC-  
461 based system for small-angle scattering data analysis. *J Appl Crystallogr.* 2003;36:1277-82. doi:  
462 10.1107/S0021889803012779. PubMed PMID: WOS:000185178600026.
- 463 36. Tria G, Mertens HDT, Kachala M, Svergun DI. Advanced ensemble modelling of flexible  
464 macromolecules using X-ray solution scattering. *lucryj.* 2015;2:207-17. doi:  
465 10.1107/S205225251500202x. PubMed PMID: WOS:000356866400011.
- 466 37. Calmettes P, Durand D, Desmadril M, Minard P, Receveur V, Smith JC. How random is a  
467 highly denatured protein? *Biophys Chem.* 1994;53(1-2):105-13. doi: 10.1016/0301-  
468 4622(94)00081-6. PubMed PMID: 17020841.
- 469 38. Ruskamo S, Chukhlieb M, Vahokoski J, Bhargav SP, Liang F, Kursula I, et al. Juxtalin is  
470 an intrinsically disordered F-actin-binding protein. *Sci Rep.* 2012;2:899. Epub 20121129. doi:  
471 10.1038/srep00899. PubMed PMID: 23198089; PubMed Central PMCID: PMCPMC3509349.
- 472 39. Svergun DI. Determination of the regularization parameter in indirect-transform methods  
473 using perceptual criteria. *J Appl Crystallogr.* 1992;25(4):495-503. doi:  
474 10.1107/S0021889892001663.
- 475 40. Martinsen V, Kursula P. Multiple sclerosis and myelin basic protein: insights into protein  
476 disorder and disease. *Amino Acids.* 2022;54(1):99-109. Epub 20211210. doi: 10.1007/s00726-  
477 021-03111-7. PubMed PMID: 34889995; PubMed Central PMCID: PMCPMC8810476.
- 478 41. Raasakka A, Ruskamo S, Barker R, Krokengen OC, Vatne GH, Kristiansen CK, et al.  
479 Neuropathy-related mutations alter the membrane binding properties of the human myelin protein  
480 P0 cytoplasmic tail. *PLoS One.* 2019;14(6):e0216833. Epub 20190607. doi:  
481 10.1371/journal.pone.0216833. PubMed PMID: 31173589; PubMed Central PMCID:  
482 PMCPMC6555526.
- 483 42. Lomize MA, Pogozheva ID, Joo H, Mosberg HI, Lomize AL. OPM database and PPM web  
484 server: resources for positioning of proteins in membranes. *Nucleic Acids Res.* 2012;40(Database  
485 issue):D370-6. Epub 20110902. doi: 10.1093/nar/gkr703. PubMed PMID: 21890895; PubMed  
486 Central PMCID: PMCPMC3245162.
- 487 43. DeLano WL. Pymol: an open-source molecular graphics tool. . *CCP4 Newsletter.*  
488 2002;40:11.
- 489 44. Jurrus E, Engel D, Star K, Monson K, Brandi J, Felberg LE, et al. Improvements to the  
490 APBS biomolecular solvation software suite. *Protein Sci.* 2018;27(1):112-28. doi:  
491 10.1002/pro.3280. PubMed PMID: WOS:000418254300012.

- 492 45. Alderson T.R. PI, Moses A.M., Forman-Kay J.D. Systematic identification of conditionally  
493 folded intrinsically disordered regions by AlphaFold2. bioRxiv. 2022. doi:  
494 <https://doi.org/10.1101/2022.02.18.481080>.
- 495 46. Laurents DV. AlphaFold 2 and NMR Spectroscopy: Partners to Understand Protein  
496 Structure, Dynamics and Function. *Front Mol Biosci*. 2022;9:906437. Epub 20220517. doi:  
497 10.3389/fmolb.2022.906437. PubMed PMID: 35655760; PubMed Central PMCID:  
498 PMCPMC9152297.
- 499 47. Ruff KM, Pappu RV. AlphaFold and Implications for Intrinsically Disordered Proteins. *J Mol*  
500 *Biol*. 2021;433(20):167208. Epub 20210818. doi: 10.1016/j.jmb.2021.167208. PubMed PMID:  
501 34418423.
- 502 48. Luo X, Inouye H, Gross AA, Hidalgo MM, Sharma D, Lee D, et al. Cytoplasmic domain of  
503 zebrafish myelin protein zero: adhesive role depends on beta-conformation. *Biophys J*.  
504 2007;93(10):3515-28. Epub 20070810. doi: 10.1529/biophysj.107.112771. PubMed PMID:  
505 17693467; PubMed Central PMCID: PMCPMC2072062.
- 506 49. Luo X, Sharma D, Inouye H, Lee D, Avila RL, Salmona M, et al. Cytoplasmic domain of  
507 human myelin protein zero likely folded as beta-structure in compact myelin. *Biophys J*.  
508 2007;92(5):1585-97. Epub 20061201. doi: 10.1529/biophysj.106.094722. PubMed PMID:  
509 17142269; PubMed Central PMCID: PMCPMC1796833.
- 510 50. Raasakka A, Jones NC, Hoffmann SV, Kursula P. Ionic strength and calcium regulate  
511 membrane interactions of myelin basic protein and the cytoplasmic domain of myelin protein  
512 zero. *Biochem Biophys Res Commun*. 2019;511(1):7-12. Epub 20190210. doi:  
513 10.1016/j.bbrc.2019.02.025. PubMed PMID: 30755303.
- 514 51. Raasakka A, Kursula P. How Does Protein Zero Assemble Compact Myelin? *Cells*.  
515 2020;9(8). Epub 20200804. doi: 10.3390/cells9081832. PubMed PMID: 32759708; PubMed  
516 Central PMCID: PMCPMC7465998.
- 517 52. Bates IR, Boggs JM, Feix JB, Harauz G. Membrane-anchoring and Charge Effects in the  
518 Interaction of Myelin Basic Protein with Lipid Bilayers Studied by Site-directed Spin Labeling\*.  
519 *Journal of Biological Chemistry*. 2003;278(31):29041-7. doi:  
520 <https://doi.org/10.1074/jbc.M302766200>.
- 521 53. Widder K, Trager J, Kerth A, Harauz G, Hinderberger D. Interaction of Myelin Basic Protein  
522 with Myelin-like Lipid Monolayers at Air-Water Interface. *Langmuir*. 2018;34(21):6095-108. Epub  
523 20180516. doi: 10.1021/acs.langmuir.8b00321. PubMed PMID: 29722987.
- 524 54. Bjornevik K, Cortese M, Healy BC, Kuhle J, Mina MJ, Leng Y, et al. Longitudinal analysis  
525 reveals high prevalence of Epstein-Barr virus associated with multiple sclerosis. *Science*.  
526 2022;375(6578):296-301. Epub 20220113. doi: 10.1126/science.abj8222. PubMed PMID:  
527 35025605.
- 528 55. Krigbaum WR, Hsu TS. Molecular conformation of bovine A1 basic protein, a coiling  
529 macromolecule in aqueous solution. *Biochemistry*. 1975;14(11):2542-6. doi:  
530 10.1021/bi00682a038. PubMed PMID: 49193.
- 531 56. Vassall KA, Bamm VV, Harauz G. MyelStones: the executive roles of myelin basic protein  
532 in myelin assembly and destabilization in multiple sclerosis. *Biochem J*. 2015;472(1):17-32. doi:  
533 10.1042/BJ20150710. PubMed PMID: 26518750.
- 534 57. Harauz G, Ladizhansky V, Boggs JM. Structural Polymorphism and Multifunctionality of  
535 Myelin Basic Protein. *Biochemistry*. 2009;48(34):8094-104. doi: 10.1021/bi901005f.
- 536 58. Moscarello MA. Myelin Basic Protein, the "Executive" Molecule of the Myelin Membrane.  
537 In: Juurlink BHJ, Devon RM, Doucette JR, Nazarali AJ, Schreyer DJ, Verge VMK, editors. *Cell*  
538 *Biology and Pathology of Myelin: Evolving Biological Concepts and Therapeutic Approaches*.  
539 Boston, MA: Springer US; 1997. p. 13-25.
- 540 59. Harauz G, Ishiyama N, Hill CMD, Bates IR, Libich DS, Farès C. Myelin basic protein—  
541 diverse conformational states of an intrinsically unstructured protein and its roles in myelin  
542 assembly and multiple sclerosis. *Micron*. 2004;35(7):503-42. doi:  
543 <https://doi.org/10.1016/j.micron.2004.04.005>.
- 544 60. Mendz GL, Brown LR, Martenson RE. Interactions of myelin basic protein with mixed  
545 dodecylphosphocholine/palmitoyllysophosphatidic acid micelles. *Biochemistry*. 1990;29(9):2304-  
546 11. doi: 10.1021/bi00461a014.

- 547 61. Warren KG, Catz I, Steinman L. Fine specificity of the antibody response to myelin basic  
548 protein in the central nervous system in multiple sclerosis: the minimal B-cell epitope and a model  
549 of its features. *Proceedings of the National Academy of Sciences*. 1995;92(24):11061-5. doi:  
550 doi:10.1073/pnas.92.24.11061.
- 551 62. Bates IR, Feix JB, Boggs JM, Harauz G. An Immunodominant Epitope of Myelin Basic  
552 Protein Is an Amphipathic  $\alpha$ -Helix\*. *Journal of Biological Chemistry*. 2004;279(7):5757-64. doi:  
553 <https://doi.org/10.1074/jbc.M311504200>.
- 554 63. Wang C, Neugebauer U, Bürck J, Myllykoski M, Baumgärtel P, Popp J, et al. Charge  
555 Isomers of Myelin Basic Protein: Structure and Interactions with Membranes, Nucleotide  
556 Analogues, and Calmodulin. *PLOS ONE*. 2011;6(5):e19915. doi: 10.1371/journal.pone.0019915.
- 557 64. Aggarwal S, Snaidero N, Pähler G, Frey S, Sánchez P, Zweckstetter M, et al. Myelin  
558 Membrane Assembly Is Driven by a Phase Transition of Myelin Basic Proteins Into a Cohesive  
559 Protein Meshwork. *PLOS Biology*. 2013;11(6):e1001577. doi: 10.1371/journal.pbio.1001577.
- 560 65. Shapiro L, Doyle JP, Hensley P, Colman DR, Hendrickson WA. Crystal structure of the  
561 extracellular domain from P0, the major structural protein of peripheral nerve myelin. *Neuron*.  
562 1996;17(3):435-49. Epub 1996/09/01. doi: 10.1016/s0896-6273(00)80176-2. PubMed PMID:  
563 8816707.
- 564 66. Liu Z, Wang Y, Yedidi RS, Brunzelle JS, Kovari IA, Sohi J, et al. Crystal structure of the  
565 extracellular domain of human myelin protein zero. *Proteins*. 2012;80(1):307-13. Epub  
566 2011/10/06. doi: 10.1002/prot.23164. PubMed PMID: 21971831.
- 567 67. Plotkowski ML, Kim S, Phillips ML, Partridge AW, Deber CM, Bowie JU. Transmembrane  
568 Domain of Myelin Protein Zero Can Form Dimers: Possible Implications for Myelin Construction.  
569 *Biochemistry*. 2007;46(43):12164-73. doi: 10.1021/bi701066h.
- 570 68. Eichberg J. Myelin P0: new knowledge and new roles. *Neurochem Res*. 2002;27(11):1331-  
571 40. Epub 2003/01/07. doi: 10.1023/a:1021619631869. PubMed PMID: 12512938.
- 572 69. Lemke G, Axel R. Isolation and sequence of a cDNA encoding the major structural protein  
573 of peripheral myelin. *Cell*. 1985;40(3):501-8. doi: [https://doi.org/10.1016/0092-8674\(85\)90198-9](https://doi.org/10.1016/0092-8674(85)90198-9).
- 574 70. Bizzozero OA, Fridal K, Pastuszyn A. Identification of the Palmitoylation Site in Rat Myelin  
575 P0 Glycoprotein. *Journal of Neurochemistry*. 1994;62(3):1163-71. doi:  
576 <https://doi.org/10.1046/j.1471-4159.1994.62031163.x>.
- 577 71. Bharadwaj M, Bizzozero OA. Myelin P0 Glycoprotein and a Synthetic Peptide Containing  
578 the Palmitoylation Site Are Both Autoacylated. *Journal of Neurochemistry*. 1995;65(4):1805-15.  
579 doi: <https://doi.org/10.1046/j.1471-4159.1995.65041805.x>.
- 580 72. Gao Y, Li W, Filbin MT. Acylation of myelin Po protein is required for adhesion. *Journal of*  
581 *Neuroscience Research*. 2000;60(6):704-13. doi: [https://doi.org/10.1002/1097-  
582 4547\(20000615\)60:6<704::AID-JNR2>3.0.CO;2-5](https://doi.org/10.1002/1097-4547(20000615)60:6<704::AID-JNR2>3.0.CO;2-5).
- 583 73. Wong MH, Filbin MT. Dominant-negative effect on adhesion by myelin Po protein  
584 truncated in its cytoplasmic domain. *J Cell Biol*. 1996;134(6):1531-41. doi:  
585 10.1083/jcb.134.6.1531. PubMed PMID: 8830780.
- 586 74. Linington C, Lassmann H, Ozawa K, Kosin S, Mongan L. Cell adhesion molecules of the  
587 immunoglobulin supergene family as tissue-specific autoantigens: induction of experimental  
588 allergic neuritis (EAN) by P0 protein-specific T cell lines. *Eur J Immunol*. 1992;22(7):1813-7. doi:  
589 10.1002/eji.1830220721. PubMed PMID: 1378018.
- 590 75. de Seze J, Kremer L, Alves do Rego C, Taleb O, Lam D, Beiano W, et al. Chronic  
591 inflammatory demyelinating polyradiculoneuropathy: A new animal model for new therapeutic  
592 targets. *Rev Neurol (Paris)*. 2016;172(12):767-9. Epub 20161109. doi:  
593 10.1016/j.neurol.2016.05.006. PubMed PMID: 27838091.
- 594 76. Sagar A, Jeffries CM, Petoukhov MV, Svergun DI, Bernado P. Comment on the Optimal  
595 Parameters to Derive Intrinsically Disordered Protein Conformational Ensembles from Small-Angle  
596 X-ray Scattering Data Using the Ensemble Optimization Method. *J Chem Theory Comput*.  
597 2021;17(4):2014-21. Epub 20210316. doi: 10.1021/acs.jctc.1c00014. PubMed PMID: 33725442.
- 598
